# Supplementary material for: Detection of human cytomegalovirus in glioblastoma among Taiwanese subjects
Source: PubMed Central journal article supplement (PMC5464665; doi:10.1371/journal.pone.0179366), 2017-06-08
Supplement: pone.0179366.s004.pdf [file pone.0179366.s004.pdf]

**S1 Table. Results of detecting UL73 gene and US28 gene in gastrointestinal tract and brain tissues.**

| Tissue with immunohistochemistry proven HCMV infection |              |               |               |
|--------------------------------------------------------|--------------|---------------|---------------|
| Tissue                                                 | Diagnosis    | UL73 Ct value | US28 Ct value |
| Esophagus                                              | HCMV*        | 39.25         | Undetermined  |
| Stomach                                                | HCMV*        | 25.26         | 32.14         |
| Stomach                                                | HCMV*        | 27.29         | 24.39         |
| Colon                                                  | HCMV*        | 26.25         | 39.37         |
| Colon                                                  | HCMV*        | 33.44         | 35.65         |
| Colon                                                  | HCMV*        | 21.43         | 25.79         |
| Tissue with no known HCMV infection                    |              |               |               |
| Tissue                                                 | Diagnosis    | UL73 Ct value | US28 Ct value |
| Cerebrum                                               | Glioblastoma | 36.38         | Undetermined  |
| Cerebrum                                               | Glioblastoma | Undetermined  | Undetermined  |
| Cerebrum                                               | Glioblastoma | Undetermined  | Undetermined  |
| Cerebrum                                               | Glioblastoma | Undetermined  | Undetermined  |
| Cerebrum                                               | Hematoma     | Undetermined  | Undetermined  |
| Cerebrum                                               | Gliosis      | Undetermined  | Undetermined  |
| Colon                                                  | Inflammation | Undetermined  | Undetermined  |
| Colon                                                  | Inflammation | Undetermined  | Undetermined  |

\*HCMV, human cytomegalovirus (immunohistochemical stain positive)
