# Supplementary material for: Detection of human cytomegalovirus in glioblastoma among Taiwanese subjects
Source: PubMed Central journal article supplement (PMC5464665; doi:10.1371/journal.pone.0179366), 2017-06-08
Supplement: pone.0179366.s005.pdf [file pone.0179366.s005.pdf]

**S2 Table. Clinico-pathological features of the analyzed patients**

| Age | Sex | UL73 | UL73 repeat | MSP | IDH1 | Ki67 | Total resection | KPS80 | Bevacizumab | PFS  | Progress | OS   | Death |
|-----|-----|------|-------------|-----|------|------|-----------------|-------|-------------|------|----------|------|-------|
| 67  | m   | 35   | 36          | 1   | 0    | 25   | 0               | 1     | 0           | 10.3 | 1        | 16.7 | 1     |
| 40  | m   | 39   | 40          | 1   | 1    | 85   | 1               | 0     | 0           | 2.9  | 1        | 13.3 | 1     |
| 9   | f   | 38   | -           | 0   | 0    | 70   | 1               | 1     | 1           | 5.6  | 1        | 14.6 | 1     |
| 72  | m   | 38   | -           | 0   | 0    | 50   | 1               | 0     | 0           | 5.5  | 1        | 13.1 | 1     |
| 56  | f   | 38.3 | -           | 1   | 0    | 40   | 1               | 1     | 0           | 8.4  | 1        | 15.5 | 1     |
| 75  | m   | 38.4 | -           | 1   | 0    | 90   | 1               | 1     | 0           | 16.4 | 1        | 20.3 | 0     |
| 54  | f   | 39   | -           | 0   | 0    | 70   | 1               | 0     | 0           | 4.7  | 1        | 10.7 | 1     |
| 37  | f   | 39   | -           | 1   | 0    | 20   | 0               | 1     | 0           | 7.6  | 1        | 23.9 | 1     |
| 57  | m   | 40   | -           | 0   | 0    | 60   | 1               | 0     | 1           | 3.1  | 1        | 8.9  | 1     |
| 46  | m   | -    | -           | 0   | 0    | 75   | 1               | 1     | 1           | 18.9 | 1        | 46.0 | 0     |
| 39  | f   | -    | -           | 1   | 0    | 30   | 0               | 0     | 0           | 1.3  | 1        | 10.5 | 1     |
| 44  | f   | -    | -           | 0   | 0    | 20   | 0               | 0     | 0           | 1.5  | 1        | 4.1  | 1     |
| 66  | f   | -    | -           | 0   | 0    | 60   | 1               | 1     | 0           | 1.5  | 1        | 8.4  | 1     |
| 15  | f   | -    | -           | 0   | 0    | 80   | 1               | 0     | 1           | 2.5  | 1        | 4.9  | 1     |
| 5   | f   | -    | -           | 0   | 0    | 90   | 0               | 0     | 0           | 2.6  | 1        | 2.6  | 1     |
| 58  | f   | -    | -           | 0   | 0    | 50   | 1               | 0     | 1           | 2.9  | 1        | 3.6  | 1     |
| 7   | f   | -    | -           | 0   | 0    | 80   | 1               | 0     | 1           | 3.0  | 1        | 13.3 | 1     |
| 65  | f   | -    | -           | 1   | 0    | 35   | 0               | 0     | 0           | 3.1  | 1        | 6.2  | 1     |
| 58  | f   | -    | -           | 0   | 0    | 20   | 0               | 1     | 0           | 3.6  | 1        | 9.5  | 1     |
| 45  | f   | -    | -           | 0   | 0    | 50   | 1               | 0     | 0           | 4.7  | 1        | 6.8  | 1     |
| 71  | f   | -    | -           | 0   | 0    | 50   | 1               | 0     | 1           | 5.0  | 1        | 12.0 | 1     |
| 54  | f   | -    | -           | 1   | 0    | 70   | 0               | 1     | 0           | 6.1  | 1        | 14.9 | 1     |
| 84  | f   | -    | -           | 1   | 0    | 20   | 1               | 1     | 0           | 6.1  | 1        | 20.0 | 1     |
| 2   | f   | -    | -           | 1   | 0    | 40   | 1               | 0     | 0           | 6.3  | 1        | 80.7 | 0     |
| 27  | f   | -    | -           | 0   | 0    | 65   | 1               | 1     | 0           | 6.3  | 1        | 11.5 | 1     |
| 74  | f   | -    | -           | 1   | 0    | 20   | 1               | 1     | 0           | 6.5  | 1        | 17.2 | 1     |
| 7   | f   | -    | -           | 0   | 0    | 90   | 0               | 0     | 1           | 7.0  | 1        | 21.5 | 1     |
| 54  | f   | -    | -           | 1   | 0    | 20   | 1               | 1     | 0           | 7.0  | 1        | 39.6 | 1     |
| 61  | f   | -    | -           | 1   | 1    | 80   | 0               | 1     | 1           | 7.5  | 1        | 36.7 | 0     |
| 51  | f   | -    | -           | 0   | 0    | 50   | 1               | 1     | 0           | 8.1  | 1        | 24.6 | 1     |
| 43  | f   | -    | -           | 1   | 0    | 40   | 1               | 1     | 0           | 8.2  | 1        | 15.6 | 1     |
| 46  | f   | -    | -           | 1   | 0    | 30   | 1               | 1     | 0           | 9.6  | 1        | 25.1 | 1     |
| 62  | f   | -    | -           | 1   | 0    | 70   | 1               | 1     | 1           | 10.6 | 1        | 22.7 | 1     |
| 80  | f   | -    | -           | 1   | 0    | 70   | 1               | 0     | 0           | 12.3 | 1        | 19.4 | 1     |
| 69  | f   | -    | -           | 1   | 0    | 80   | 1               | 1     | 0           | 13.5 | 1        | 20.9 | 1     |
| 70  | f   | -    | -           | 0   | 0    | 25   | 1               | 1     | 0           | 14.8 | 1        | 22.4 | 1     |

|    |   |   |  |   |   |    |   |   |   |      |   |      |   |
|----|---|---|--|---|---|----|---|---|---|------|---|------|---|
| 56 | f | - |  | 1 | 0 | 70 | 0 | 1 | 0 | 15.2 | 1 | 20.2 | 1 |
| 14 | f | - |  | 0 | 1 | 50 | 0 | 0 | 0 | 15.8 | 1 | 24.6 | 1 |
| 33 | f | - |  | 1 | 1 | 80 | 0 | 1 | 0 | 17.1 | 1 | 23.6 | 1 |
| 79 | f | - |  | 1 | 0 | 40 | 1 | 0 | 0 | 18.0 | 1 | 19.2 | 1 |
| 55 | f | - |  | 0 | 0 | 80 | 1 | 0 | 0 | 19.3 | 1 | 22.0 | 0 |
| 55 | f | - |  | 0 | 0 | 30 | 0 | 0 | 1 | 19.6 | 0 | 19.6 | 0 |
| 60 | f | - |  | 1 | 0 | 65 | 1 | 1 | 0 | 20.4 | 1 | 29.2 | 1 |
| 63 | f | - |  | 1 | 0 | 85 | 1 | 1 | 0 | 20.7 | 1 | 26.1 | 1 |
| 83 | f | - |  | 1 | 0 | 40 | 1 | 0 | 0 | 24.9 | 0 | 26.2 | 1 |
| 35 | f | - |  | 1 | 0 | 40 | 1 | 1 | 0 | 27.8 | 0 | 36.1 | 0 |
| 41 | f | - |  | 1 | 0 | 80 | 1 | 1 | 0 | 32.3 | 1 | 36.2 | 0 |
| 70 | f | - |  | 1 | 0 | 45 | 1 | 1 | 1 | 38.3 | 1 | 48.8 | 1 |
| 40 | f | - |  | 1 | 0 | 50 | 1 | 1 | 1 | 39.1 | 1 | 53.0 | 0 |
| 42 | f | - |  | 1 | 1 | 25 | 1 | 1 | 0 | 58.5 | 0 | 66.9 | 0 |
| 49 | f | - |  | 1 | 1 | 35 | 1 | 1 | 0 | 82.3 | 0 | 82.3 | 0 |
| 85 | f | - |  | 0 | 0 | 35 | 1 | 0 | 0 | 2.3  | 1 | 3.0  | 1 |
| 20 | f | - |  | 1 | 0 | 35 | 1 | 1 | 0 | 3.5  | 1 | 18.0 | 1 |
| 58 | m | - |  | 0 | 0 | 75 | 1 | 1 | 0 | 2.3  | 1 | 14.6 | 1 |
| 67 | m | - |  | 0 | 0 | 45 | 0 | 0 | 0 | 3.5  | 1 | 5.4  | 1 |
| 73 | m | - |  | 1 | 0 | 40 | 1 | 0 | 0 | 22.0 | 0 | 22.0 | 0 |
| 57 | m | - |  | 1 | 0 | 15 | 0 | 1 | 0 | 1.0  | 1 | 3.9  | 1 |
| 48 | m | - |  | 0 | 0 | 70 | 1 | 0 | 0 | 1.1  | 1 | 8.7  | 1 |
| 55 | m | - |  | 0 | 0 | 15 | 1 | 1 | 1 | 1.2  | 1 | 12.1 | 1 |
| 65 | m | - |  | 0 | 0 | 60 | 1 | 0 | 0 | 1.5  | 1 | 6.5  | 1 |
| 41 | m | - |  | 0 | 0 | 90 | 1 | 0 | 0 | 1.8  | 1 | 3.6  | 1 |
| 11 | m | - |  | 0 | 0 | 70 | 1 | 0 | 0 | 2.2  | 1 | 2.2  | 1 |
| 65 | m | - |  | 0 | 0 | 40 | 1 | 1 | 0 | 2.2  | 1 | 4.1  | 1 |
| 33 | m | - |  | 0 | 0 | 95 | 1 | 0 | 0 | 2.8  | 1 | 3.3  | 1 |
| 38 | m | - |  | 0 | 0 | 45 | 1 | 1 | 0 | 2.8  | 1 | 22.8 | 1 |
| 70 | m | - |  | 0 | 0 | 30 | 1 | 1 | 0 | 2.9  | 1 | 12.2 | 1 |
| 62 | m | - |  | 0 | 0 | 40 | 1 | 1 | 0 | 3.2  | 1 | 14.8 | 1 |
| 56 | m | - |  | 1 | 0 | 40 | 1 | 0 | 0 | 3.6  | 1 | 6.7  | 1 |
| 64 | m | - |  | 0 | 0 | 35 | 1 | 1 | 0 | 4.0  | 1 | 12.8 | 1 |
| 78 | m | - |  | 0 | 0 | 80 | 1 | 0 | 0 | 4.0  | 1 | 24.6 | 1 |
| 60 | m | - |  | 0 | 0 | 25 | 1 | 1 | 0 | 4.1  | 1 | 15.9 | 1 |
| 58 | m | - |  | 1 | 0 | 25 | 0 | 1 | 0 | 4.6  | 1 | 23.1 | 1 |
| 61 | m | - |  | 1 | 0 | 70 | 1 | 0 | 0 | 4.8  | 1 | 10.5 | 1 |
| 69 | m | - |  | 0 | 0 | 40 | 1 | 0 | 0 | 4.9  | 1 | 8.5  | 1 |
| 54 | m | - |  | 0 | 0 | 60 | 1 | 1 | 0 | 5.1  | 1 | 10.6 | 1 |
| 74 | m | - |  | 0 | 0 | 30 | 1 | 1 | 0 | 5.1  | 1 | 16.5 | 1 |

|    |   |   |  |   |   |    |   |   |   |      |   |      |   |
|----|---|---|--|---|---|----|---|---|---|------|---|------|---|
| 56 | m | - |  | 1 | 0 | 60 | 1 | 0 | 0 | 5.3  | 1 | 17.6 | 1 |
| 5  | m | - |  | 0 | 0 | 15 | 1 | 0 | 1 | 5.4  | 1 | 20.1 | 1 |
| 61 | m | - |  | 1 | 0 | 35 | 1 | 1 | 0 | 5.4  | 1 | 20.1 | 1 |
| 76 | m | - |  | 0 | 0 | 20 | 1 | 1 | 0 | 5.4  | 1 | 6.3  | 1 |
| 38 | m | - |  | 0 | 0 | 40 | 1 | 1 | 0 | 5.7  | 1 | 10.3 | 1 |
| 16 | m | - |  | 0 | 0 | 50 | 0 | 1 | 0 | 5.9  | 1 | 5.9  | 1 |
| 26 | m | - |  | 1 | 0 | 80 | 1 | 1 | 1 | 6.0  | 1 | 16.7 | 0 |
| 81 | m | - |  | 1 | 0 | 30 | 1 | 0 | 0 | 6.4  | 0 | 6.4  | 0 |
| 68 | m | - |  | 1 | 0 | 40 | 1 | 1 | 0 | 6.7  | 1 | 39.7 | 1 |
| 12 | m | - |  | 1 | 0 | 35 | 0 | 0 | 0 | 7.2  | 1 | 14.0 | 1 |
| 60 | m | - |  | 1 | 0 | 50 | 1 | 1 | 0 | 7.4  | 1 | 20.3 | 1 |
| 61 | m | - |  | 0 | 0 | 30 | 1 | 0 | 0 | 7.5  | 1 | 9.9  | 0 |
| 56 | m | - |  | 0 | 0 | 60 | 1 | 0 | 1 | 8.1  | 1 | 19.0 | 1 |
| 32 | m | - |  | 1 | 1 | 70 | 1 | 0 | 1 | 8.2  | 1 | 10.7 | 1 |
| 9  | m | - |  | 1 | 0 | 90 | 1 | 1 | 0 | 8.2  | 1 | 15.8 | 1 |
| 53 | m | - |  | 1 | 0 | 80 | 1 | 1 | 0 | 8.7  | 1 | 17.2 | 1 |
| 30 | m | - |  | 1 | 0 | 70 | 1 | 0 | 1 | 8.8  | 1 | 10.7 | 1 |
| 54 | m | - |  | 0 | 0 | 25 | 1 | 0 | 0 | 9.6  | 1 | 15.2 | 1 |
| 77 | m | - |  | 1 | 0 | 20 | 1 | 0 | 0 | 10.0 | 1 | 21.8 | 1 |
| 40 | m | - |  | 1 | 0 | 25 | 0 | 0 | 1 | 10.3 | 1 | 20.8 | 0 |
| 47 | m | - |  | 0 | 0 | 40 | 1 | 1 | 1 | 10.4 | 1 | 18.3 | 0 |
| 33 | m | - |  | 1 | 0 | 40 | 1 | 1 | 0 | 11.2 | 1 | 21.5 | 1 |
| 71 | m | - |  | 1 | 0 | 50 | 1 | 0 | 1 | 12.2 | 0 | 12.3 | 0 |
| 53 | m | - |  | 0 | 0 | 30 | 1 | 0 | 0 | 12.8 | 1 | 15.3 | 1 |
| 13 | m | - |  | 1 | 0 | 80 | 1 | 0 | 0 | 13.5 | 1 | 27.5 | 1 |
| 83 | m | - |  | 1 | 0 | 50 | 1 | 0 | 0 | 13.9 | 1 | 13.9 | 1 |
| 54 | m | - |  | 0 | 0 | 35 | 0 | 0 | 1 | 14.4 | 1 | 18.6 | 1 |
| 32 | m | - |  | 0 | 1 | 45 | 0 | 0 | 0 | 14.8 | 1 | 17.6 | 1 |
| 57 | m | - |  | 0 | 0 | 60 | 1 | 1 | 0 | 14.9 | 1 | 16.6 | 1 |
| 43 | m | - |  | 0 | 0 | 20 | 1 | 0 | 0 | 15.9 | 1 | 23.7 | 1 |
| 53 | m | - |  | 1 | 0 | 40 | 1 | 1 | 0 | 18.3 | 1 | 28.3 | 1 |
| 30 | m | - |  | 0 | 1 | 60 | 1 | 1 | 0 | 21.8 | 1 | 23.1 | 1 |
| 44 | m | - |  | 1 | 0 | 20 | 1 | 1 | 1 | 22.3 | 1 | 56.9 | 0 |
| 63 | m | - |  | 1 | 0 | 70 | 1 | 1 | 1 | 22.6 | 1 | 25.2 | 1 |
| 60 | m | - |  | 0 | 0 | 20 | 1 | 0 | 0 | 22.6 | 1 | 34.3 | 1 |
| 61 | m | - |  | 1 | 0 | 20 | 1 | 1 | 0 | 23.3 | 1 | 40.3 | 1 |
| 36 | m | - |  | 0 | 1 | 70 | 1 | 1 | 0 | 24.7 | 0 | 33.2 | 0 |
| 61 | m | - |  | 1 | 0 | 45 | 1 | 0 | 0 | 26.1 | 1 | 34.0 | 1 |
| 72 | m | - |  | 0 | 0 | 15 | 1 | 1 | 0 | 29.3 | 1 | 30.6 | 0 |
| 52 | m | - |  | 1 | 0 | 50 | 1 | 1 | 0 | 68.5 | 0 | 75.3 | 1 |

KPS80, Karnofsky performance status  $\geq 80$ ; IDH1, isocitrate dehydrogenase 1; MSP, MGMT methylation specific PCR; PFS, Progression-free survival; OS, Overall survival
